# Supplementary material
Source: publisher figshare collection journal article supplement (https://tandf.figshare.com/ndownloader/files/17761316)
Supplement: Supplementary file 1 [file 17761316]

Support information

Network Morphology and Electro-optical Characterizations of Epoxy-Based Polymer Stabilized Liquid Crystals

Wenbo Shena, Yaping Caob,c, Cuihong Zhangb, Xiaotao Yuand*, Zhou Yanga*, and Lanying Zhangb,c*

aDepartment of Materials Physics and Chemistry, School of Materials Science and Engineering, University of Science and Technology Beijing, Beijing 100083, People’s Republic of China.

bDepartment of Materials Science and Engineering, College of Engineering, Peking University, Beijing, P. R. China.

cKey Laboratory of Polymer Chemistry and Physics of Ministry of Education, Peking University, Beijing, P. R. China.

dDepartment of Chemistry and Chemical Engineering, School of Chemistry and Biological Engineering, University of Science and Technology Beijing, Beijing 100083, P. R. China.

**CONDUCT (corresponding authors’ emails):**

*Xiaotao Yuan, E-mail: [yuanxt@ustb.edu.cn](mailto:yuanxt@ustb.edu.cn); *Zhou Yang, E-mail: [yangz@ustb.edu.cn](mailto:yangz@ustb.edu.cn); *Lanying Zhang, E-mail: [zhanglanying@pku.edu.cn](mailto:zhanglanying@pku.edu.cn)

**Figure S1.** DSC thermograph of LC2 at a cooling rate of 10 °C/min.


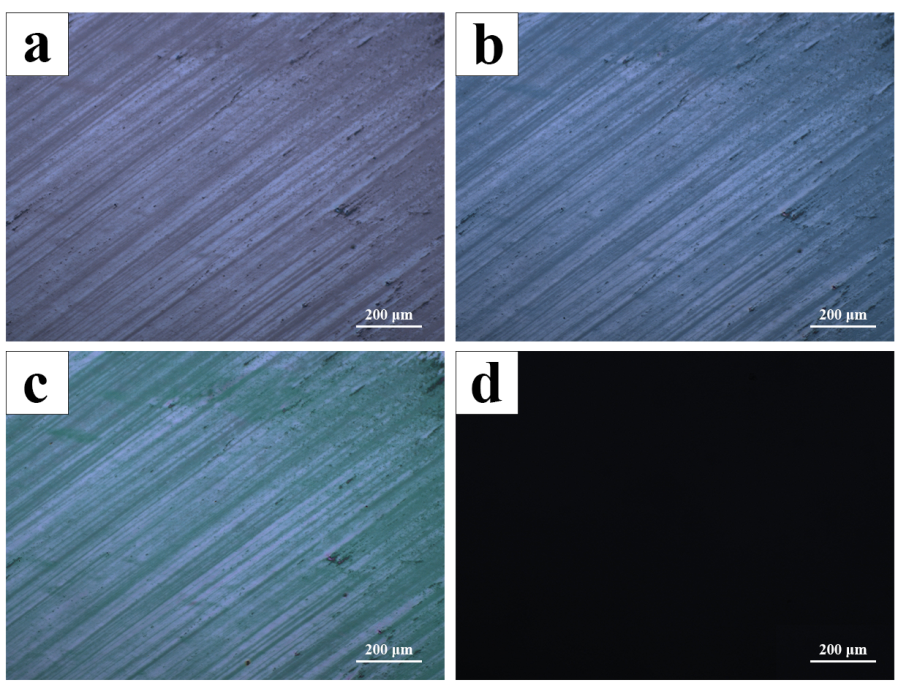


**Figure S2.** POM images of the pre-mixture of sample C at (a) room temperature, (b) 40 °C, (c) 60 °C, and (d) 80 °C.
